# Supplementary figures and images for: In-depth Sampling of High-risk Populations to Characterize HIV Transmission Epidemics Among Young MSM Using PrEP in France and Quebec
Source: PubMed Central journal article supplement — Open Forum Infect Dis. 2019 Feb 15;6(3):ofz080. doi: 10.1093/ofid/ofz080 (PMC6422434; doi:10.1093/ofid/ofz080), 2019-02-15

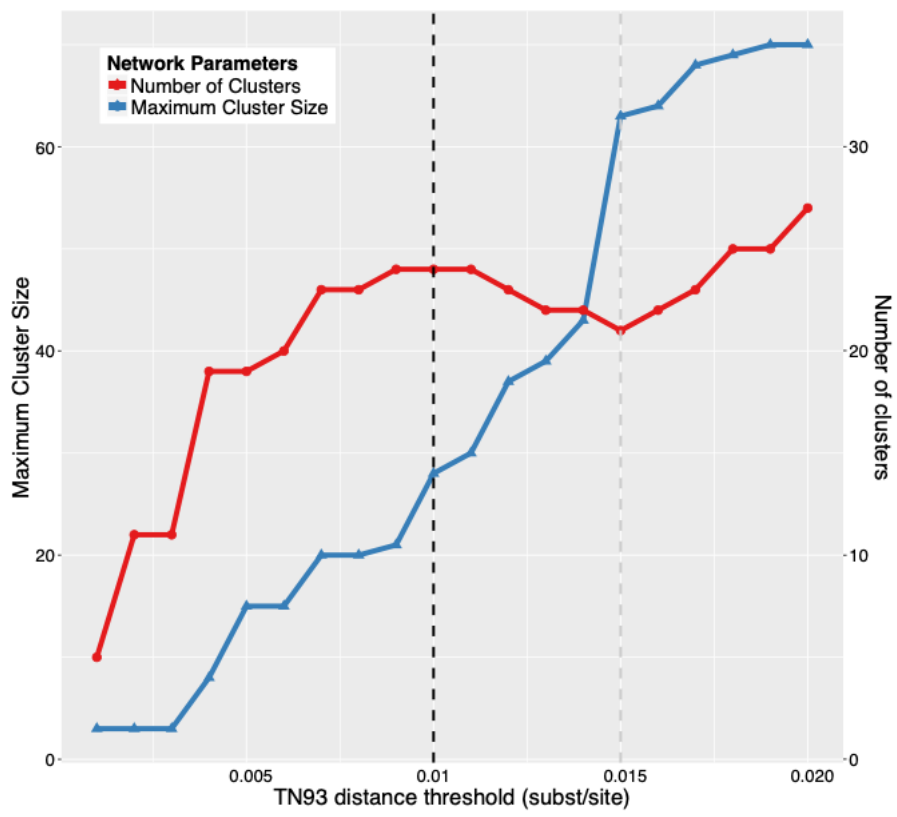

Supplement: ofz080_suppl_supplementary_figure_1.pdf [file ofz080_suppl_supplementary_figure_1.pdf]

A

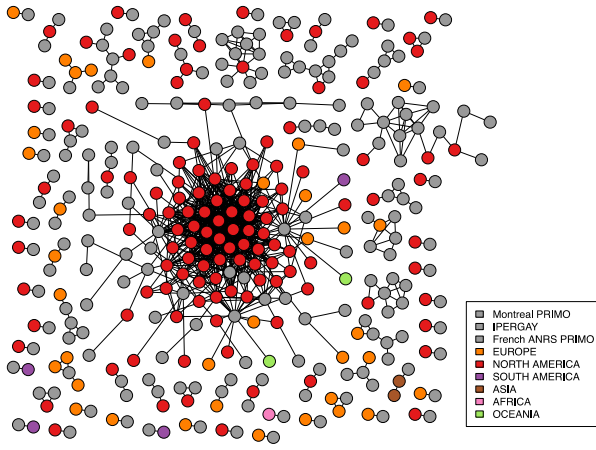

B

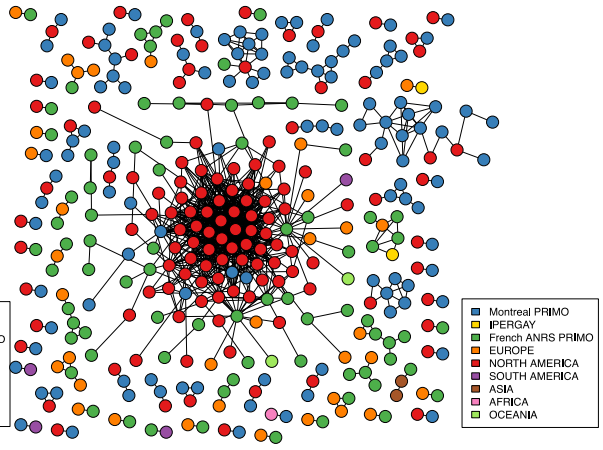

Supplement: ofz080_suppl_supplementary_figure_2.pdf [file ofz080_suppl_supplementary_figure_2.pdf]

A

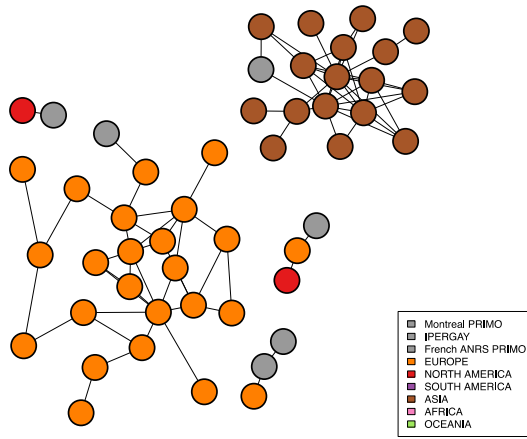

B

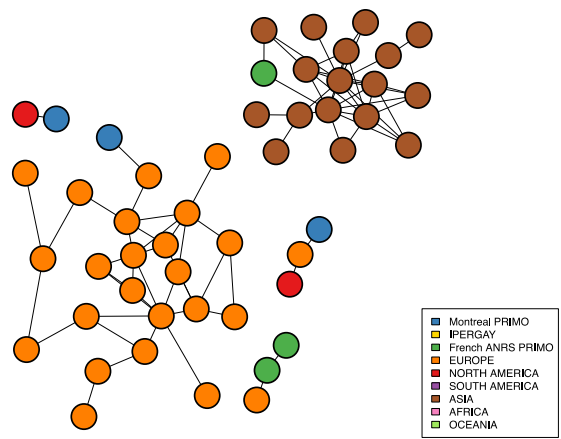

Supplement: ofz080_suppl_supplementary_figure_3.pdf [file ofz080_suppl_supplementary_figure_3.pdf]
